# Supplementary material for: Development, Validation and Application of an Ultra-High-Performance Liquid Chromatography–Tandem Mass Spectrometry (UHPLC-MS/MS) Method after QuEChERS Cleanup for Selected Dichloroanilines and Phthalates in Rice Samples
Source: MDPI journal article supplement (doi:10.3390/foods11101482), 2022-05-19
Supplement: s1 [file s1]

Supplementary material

# Development, validation and application of an ultra-high performance liquid chromatography-tandem mass spectrometry (UHPLC-MS/MS) method after QuEChERS clean up for selected dichloroanilines and phthalates in rice samples

Emmanouil Tsochatzis <sup>1,\*</sup>, Olga Begou<sup>2,3</sup>, Stavros Kalogiannis<sup>3,4</sup>, Helen Gika<sup>3,5</sup>, Emel Oz<sup>1,6</sup>, Fatih Oz<sup>1,6</sup>, Georgios Theodoridis<sup>2,3</sup>

<sup>1</sup> Aarhus University, Department of Food Science, Agro Food Park 48, Aarhus 8200 N, Denmark; emmanouil.tsochatzis@food.au.dk (E.T.)

<sup>2</sup> Laboratory of Analytical Chemistry, Department of Chemistry, Aristotle University of Thessaloniki, University Campus, 54124 Thessaloniki, Greece; mpegolga@chem.auth.gr (O.B.); gtheodor@chem.auth.gr (G.T.)

<sup>3</sup> Biomic\_AUTH, Center for Interdisciplinary Research and Innovation (CIRI-AUTH), Balkan Center, B1.4, 10th km Thessaloniki-Thermi Rd, P.O. Box 8318, 57001 Thessaloniki, Greece; Kalogian@ihu.gr (S.K.)

<sup>4</sup> International Hellenic University, Department of Nutritional Sciences and Dietetics, P.O. 141 Sindos, 57400, Thessaloniki, Greece

<sup>5</sup> Laboratory of Forensic Medicine and Toxicology, School of Medicine, Aristotle University of Thessaloniki, University Campus, 54124 Thessaloniki, Greece; gkikae@auth.gr

<sup>6</sup> Ataturk University, Agriculture Faculty, Food Engineering Department, 25240, Erzurum, Turkey; emel.oz@atauni.edu.tr (E.O.) fatihoz@atauni.edu.tr (F.O.)

\* Correspondence: Emmanouil Tsochatzis (E.T.); emmanouil.tsochatzis@food.au.dk; Tel.: +306977441091 (Current Affiliation: European Food Safety Authority-EFSA, Via Carlo Magno 1A, 43146, Parma, Italy)

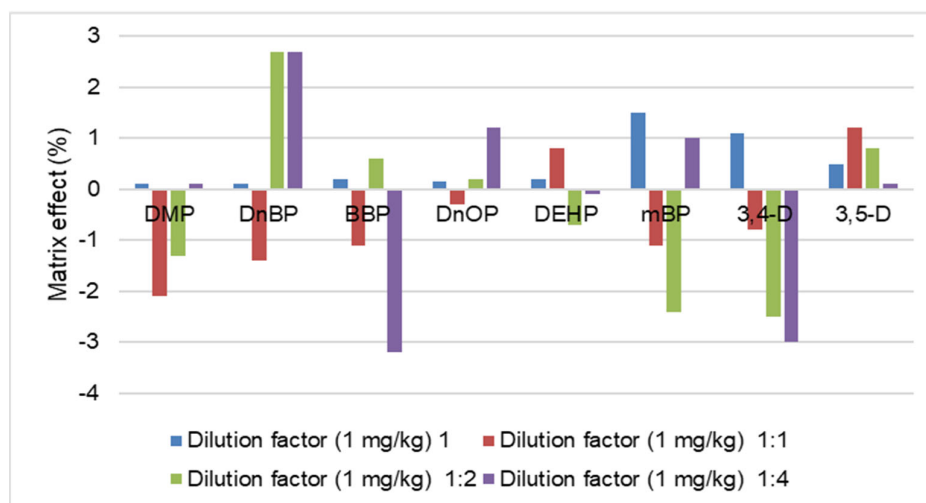

**Figure S1.** Matrix effect (%) of target analytes, in one concentration in un-diluted (dilution factor; df=1) and diluted samples (df=2,3 and 4).
